# Supplementary material
Source: publisher site journal article supplement (https://www.dovepress.com/article/supplementary_file/616021/616021%20Supplementary%20Material.docx)
Supplement: Supplementary file 1 [file 616021%20Supplementary%20Material.docx]

**Supplementary Information File 1.** STARD 2015 Checklist

*Completed for: "Diagnostic Accuracy and Reliability of the Thai Version of the Leeds Assessment of Neuropathic Symptoms and Signs Pain Scale in Adults With Chronic Pain"*

Based on detailed review of Manuscript.docx

**Key: Reported Partial N/A** “Partial” indicates the manuscript addresses the item incompletely. “N/A” indicates the item is not reported or not applicable from the submitted text.

| **Section & Topic** | **No.** | **STARD item** | **Page no(s).** | **Status / note** |
| --- | --- | --- | --- | --- |
| TITLE OR ABSTRACT | 1 | Identification as a study of diagnostic accuracy using at least one measure of accuracy (such as sensitivity, specificity, predictive values, or AUC) | 1 | Reported in abstract |
| ABSTRACT | 2 | Structured summary of study design, methods, results, and conclusions | 1-2 | Reported in abstract |
| INTRODUCTION | 3 | Scientific and clinical background, including the intended use and clinical role of the index test | 2-3 | Reported |
| INTRODUCTION | 4 | Study objectives and hypotheses | 3 | Reported |
| METHODS - Study design | 5 | Whether data collection was planned before the index test and reference standard were performed (prospective study) or after (retrospective study) | 3-4 | Reported |
| METHODS - Participants | 6 | Eligibility criteria | 5 | Reported |
| METHODS - Participants | 7 | On what basis potentially eligible participants were identified (such as symptoms, results from previous tests, inclusion in registry) | 5 | Reported |
| METHODS - Participants | 8 | Where and when potentially eligible participants were identified (setting, location and dates) | 3-4 | Reported |
| METHODS - Participants | 9 | Whether participants formed a consecutive, random or convenience series | 3 | Reported as quota-based two-group sampling |
| METHODS - Test methods | 10a | Index test, in sufficient detail to allow replication | 4-6 | Reported |
| METHODS - Test methods | 10b | Reference standard, in sufficient detail to allow replication | 4-6 | Reported |
| METHODS - Test methods | 11 | Rationale for choosing the reference standard (if alternatives exist) | 4 | Reported |
| METHODS - Test methods | 12a | Definition of and rationale for test positivity cut-offs or result categories of the index test, distinguishing pre-specified from exploratory | 1, 6, 8-10 | Reported |
| METHODS - Test methods | 12b | Definition of and rationale for test positivity cut-offs or result categories of the reference standard, distinguishing pre-specified from exploratory | 4-6 | Reported |
| METHODS - Test methods | 13a | Whether clinical information and reference standard results were available to the performers/readers of the index test | 4-6 | Reported |
| METHODS - Test methods | 13b | Whether clinical information and index test results were available to the assessors of the reference standard | 4 | Reported |
| METHODS - Analysis | 14 | Methods for estimating or comparing measures of diagnostic accuracy | 6-7 | Reported |
| METHODS - Analysis | 15 | How indeterminate index test or reference standard results were handled | 8 | Reported — no indeterminate results occurred. |
| METHODS - Analysis | 16 | How missing data on the index test and reference standard were handled | 8 | Reported — no missing index test or reference standard data. |
| METHODS - Analysis | 17 | Any analyses of variability in diagnostic accuracy, distinguishing pre-specified from exploratory | 6, 8-10 | Reported— exploratory Thai-derived cutoff identified using the Youden index. |
| METHODS - Analysis | 18 | Intended sample size and how it was determined | 6-7 | Reported |
| RESULTS - Participants | 19 | Flow of participants, using a diagram | 8 | Reported |
| RESULTS - Participants | 20 | Baseline demographic and clinical characteristics of participants | 8 | Reported (Table 1) |
| RESULTS - Participants | 21a | Distribution of severity of disease in those with the target condition | N/A | Not specifically reported |
| RESULTS - Participants | 21b | Distribution of alternative diagnoses in those without the target condition | N/A | Not reported |
| RESULTS - Participants | 22 | Time interval and any clinical interventions between index test and reference standard | 6 | Reported |
| RESULTS - Test results | 23 | Cross tabulation of the index test results (or their distribution) by the results of the reference standard | 8 | Reported |
| RESULTS - Test results | 24 | Estimates of diagnostic accuracy and their precision (such as 95% confidence intervals) | 1, 8-10 | Reported |
| RESULTS - Test results | 25 | Any adverse events from performing the index test or the reference standard | N/A | Not reported — no adverse events from the index test or reference standard were described |
| DISCUSSION | 26 | Study limitations, including sources of potential bias, statistical uncertainty, and generalisability | 10-11 | Reported |
| DISCUSSION | 27 | Implications for practice, including the intended use and clinical role of the index test | 10-11 | Reported |
| OTHER INFORMATION | 28 | Registration number and name of registry | N/A | Not reported— observational diagnostic accuracy and psychometric validation study; clinical trial registration not applicable. |
| OTHER INFORMATION | 29 | Where the full study protocol can be accessed | N/A | Not reported— the full study protocol was not publicly available. |
| OTHER INFORMATION | 30 | Sources of funding and other support; role of funders | 12 | Reported |

**Supplementary Information Table 1.** Classification performance of the Thai LANSS at the exploratory Thai-derived cutoff of ≥9.

| **Metrics** | **Estimate (%)** | **95% CI** |
| --- | --- | --- |
| Sensitivity | 90.00 | 82.41–97.59 |
| Specificity | 81.70 | 71.92–91.48 |
| Positive predictive value | 83.08 | 73.96–92.20 |
| Negative predictive value | 89.09 | 80.85–97.34 |

Abbreviations: LANSS, Leeds Assessment of Neuropathic Symptoms and Signs
